# Supplementary material for: Allostatic Load and Exposure Histories of Disadvantage
Source: MDPI journal article supplement (doi:10.3390/ijerph18147222), 2021-07-06
Supplement: s1 [file s1]

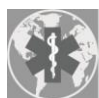

# Allostatic Load and Exposure Histories of Disadvantage- Supplementary Information

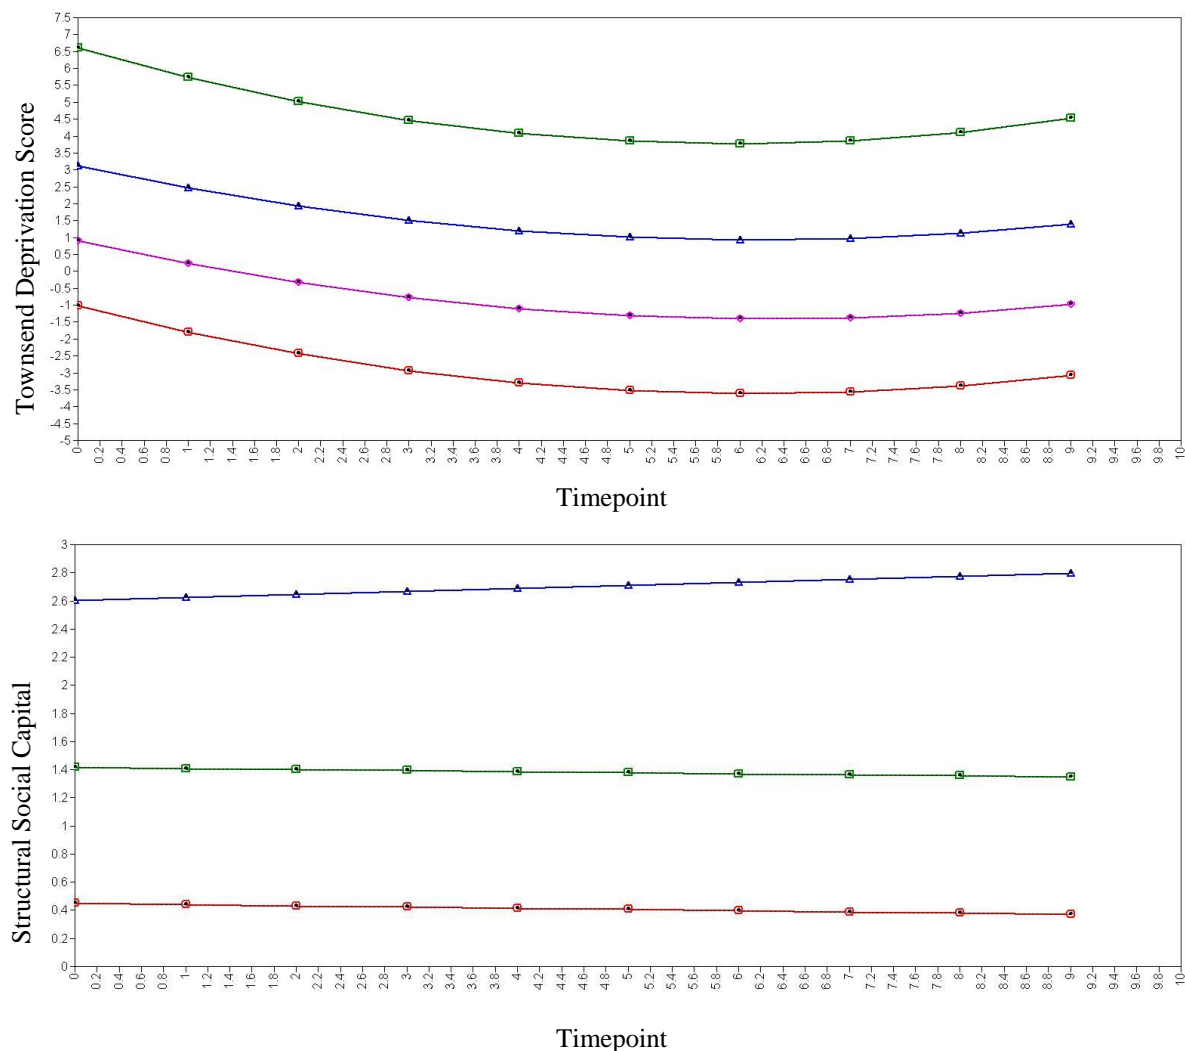

**Figure S1.** Exposure histories for Townsend deprivation score and structural social capital.

**Table S1.** Estimated allostatic load means by deprivation histories and covariate coefficients predicting allostatic load for balanced sample of BHPS participants.

|                                       |                      | <b>Model 1:<br/>No covariates</b> |       | <b>Model 2:<br/>Age and sex</b> |       | <b>Model 3:<br/>Sociodemographics</b> |       |
|---------------------------------------|----------------------|-----------------------------------|-------|---------------------------------|-------|---------------------------------------|-------|
| <i>N</i>                              |                      | 1177                              |       | 1177                            |       | 1175                                  |       |
| <i>Allostatic load</i>                |                      | Mean                              | S.E.  | Mean                            | S.E.  | Mean                                  | S.E.  |
| <i>Deprivation Exposure History</i>   | Low                  | 3.300                             | 0.102 | 3.202                           | 0.112 | 2.741                                 | 0.183 |
|                                       | Medium               | 3.525                             | 0.144 | 3.482                           | 0.150 | 2.913                                 | 0.228 |
|                                       | High                 | 3.818                             | 0.181 | 3.793                           | 0.187 | 3.129                                 | 0.261 |
|                                       | Very high            | 3.678                             | 0.306 | 3.567                           | 0.305 | 2.816                                 | 0.368 |
|                                       | Overall test p-value | 0.067                             |       | 0.022                           |       | 0.293                                 |       |
|                                       |                      | Beta                              | S.E.  | Beta                            | S.E.  | Beta                                  | S.E.  |
| <i>Age</i>                            |                      |                                   |       | 0.043                           | 0.005 | 0.034                                 | 0.008 |
| <i>Sex</i>                            | Female*              |                                   |       |                                 |       |                                       |       |
|                                       | Male                 |                                   |       | 0.162                           | 0.137 | 0.226                                 | 0.139 |
| <i>Education</i>                      | Degree*              |                                   |       |                                 |       |                                       |       |
|                                       | A-Level/GCSE         |                                   |       |                                 |       | 0.267                                 | 0.094 |
|                                       | Other/None           |                                   |       |                                 |       | 0.254                                 | 0.166 |
| <i>Employment Status</i>              | Employed*            |                                   |       |                                 |       |                                       |       |
|                                       | Retired              |                                   |       |                                 |       | 0.267                                 | 0.094 |
|                                       | Unemployed/Inactive  |                                   |       |                                 |       | 0.219                                 | 0.222 |
| <i>Subjective Financial Situation</i> | Comfortable/Alright* |                                   |       |                                 |       |                                       |       |
|                                       | Just getting by      |                                   |       |                                 |       | 0.373                                 | 0.303 |
|                                       | Finding it difficult |                                   |       |                                 |       | 0.255                                 | 0.175 |
| <i>Tenure</i>                         | Owned*               |                                   |       |                                 |       |                                       |       |
|                                       | Privately rented     |                                   |       |                                 |       | 0.554                                 | 0.297 |
|                                       | Socially rented      |                                   |       |                                 |       | 0.191                                 | 0.384 |
| <i>Marital status</i>                 | Married*             |                                   |       |                                 |       |                                       |       |
|                                       | Single/SDW           |                                   |       |                                 |       | 0.131                                 | 0.156 |

Notes: \* indicates reference category.

**Table S2.** Estimated allostatic load means by social capital histories and covariate coefficients predicting allostatic load for balanced sample of BHPS participants.

|                                       |                      | <b>Model 1:<br/>No covariates</b> |       | <b>Model 2:<br/>Age and sex</b> |       | <b>Model 3:<br/>Sociodemographics</b> |       |
|---------------------------------------|----------------------|-----------------------------------|-------|---------------------------------|-------|---------------------------------------|-------|
| <i>N</i>                              |                      | 1177                              |       | 1177                            |       | 1175                                  |       |
| <i>Allostatic load</i>                |                      | Mean                              | S.E.  | Mean                            | S.E.  | Mean                                  | S.E.  |
| <i>Social Capital Class</i>           | Low                  | 3.405                             | 0.099 | 3.399                           | 0.112 | 2.641                                 | 0.222 |
|                                       | Medium               | 3.581                             | 0.137 | 3.464                           | 0.148 | 2.892                                 | 0.194 |
|                                       | High                 | 3.516                             | 0.246 | 3.230                           | 0.251 | 2.758                                 | 0.282 |
|                                       | Overall test p-value | 0.607                             |       | 0.712                           |       | 0.397                                 |       |
|                                       |                      | Beta                              | S.E.  | Beta                            | S.E.  | Beta                                  | S.E.  |
| <i>Age</i>                            |                      |                                   |       | 0.042                           | 0.005 | 0.030                                 | 0.008 |
| <i>Sex</i>                            | Female*              |                                   |       |                                 |       |                                       |       |
|                                       | Male                 |                                   |       | 0.157                           | 0.138 | 0.232                                 | 0.139 |
| <i>Education</i>                      | Degree*              |                                   |       |                                 |       |                                       |       |
|                                       | A-Level/GCSE         |                                   |       |                                 |       | 0.328                                 | 0.099 |
|                                       | Other/None           |                                   |       |                                 |       | 0.322                                 | 0.174 |
| <i>Employment Status</i>              | Employed*            |                                   |       |                                 |       |                                       |       |
|                                       | Retired              |                                   |       |                                 |       | 0.328                                 | 0.099 |
|                                       | Unemployed/Inactive  |                                   |       |                                 |       | 0.276                                 | 0.222 |
| <i>Subjective Financial Situation</i> | Comfortable/Alright* |                                   |       |                                 |       |                                       |       |
|                                       | Just getting by      |                                   |       |                                 |       | 0.389                                 | 0.299 |
|                                       | Finding it difficult |                                   |       |                                 |       | 0.292                                 | 0.171 |
| <i>Tenure</i>                         | Owned*               |                                   |       |                                 |       |                                       |       |
|                                       | Privately rented     |                                   |       |                                 |       | 0.630                                 | 0.297 |
|                                       | Socially rented      |                                   |       |                                 |       | 0.174                                 | 0.381 |
| <i>Marital status</i>                 | Married*             |                                   |       |                                 |       |                                       |       |
|                                       | Single/SDW           |                                   |       |                                 |       | 0.194                                 | 0.157 |

Notes: \* indicates reference category.
